# Supplementary material for: Robot-Assisted versus Laparoscopic-Assisted Gastrectomy among Gastric Cancer Patients: A Retrospective Short-Term Analysis from a Single Institution in China
Source: Hindawi journal article supplement (doi:10.1155/2019/9059176), 2019-10-23
Supplement: f1 [file 9059176.f1.pdf]

**Table S1. Comparison of FH and SH in RAG series**

| Clinicopathological Features            | FH (N=8)   | SH (N=25)   | P value       |
|-----------------------------------------|------------|-------------|---------------|
| Gender (male/female)                    | 5:3        | 19:6        | 0.651         |
| Age (years)                             | 56.9±11.3  | 55.2±10.2   | 0.702         |
| ASA (2/3)                               | 6:2        | 24:1        | 0.139         |
| BMI (kg/m <sup>2</sup> )                | 22.00±3.47 | 22.50±2.94  | 0.689         |
| Comorbidity                             | 1(12.50%)  | 6(24.00%)   | 0.652         |
| Resection type (total/distal)           | 3:5        | 4:21        | 0.320         |
| Reconstruction type (B-I/B-II/R-Y)      | 2:3:3      | 8:12:5      | 0.672         |
| Tumor location (U/M/L)                  | 3:2:3      | 4:3:18      | 0.168         |
| Operation time (min)                    | 368.1±73.2 | 321.9±54.1  | 0.063         |
| Estimated blood loss (ml)               | 87.5±51.8  | 54.4±34.7   | 0.074         |
| Tumor size (cm)                         | 2.1±1.3    | 2.4±1.0     | 0.599         |
| T stage                                 |            |             | 0.788         |
| T1a                                     | 2 (25.00%) | 11 (44.00%) |               |
| T1b                                     | 1 (12.50%) | 4 (16.00%)  |               |
| T2                                      | 3 (37.50%) | 7 (28.00%)  |               |
| T3                                      | 2 (25.00%) | 3 (12.00%)  |               |
| T4a                                     | 0 (0.00%)  | 0 (0.00%)   |               |
| N stage                                 |            |             | 0.496         |
| N0                                      | 5 (62.50%) | 18 (72.00%) |               |
| N1                                      | 2 (25.00%) | 2 (8.00%)   |               |
| N2                                      | 0 (0.00%)  | 3 (12.00%)  |               |
| N3a                                     | 1 (12.50%) | 2 (8.00%)   |               |
| N3b                                     | 0 (0.00%)  | 0 (0.00%)   |               |
| TNM stage                               |            |             | 0.860         |
| Ia                                      | 3 (37.50%) | 13 (52.00%) |               |
| Ib                                      | 2 (25.00%) | 4 (16.00%)  |               |
| IIa                                     | 1 (12.50%) | 3 (12.00%)  |               |
| IIb                                     | 1 (12.50%) | 4 (16.00%)  |               |
| IIIa                                    | 0 (0.00%)  | 0 (0.00%)   |               |
| IIIb                                    | 1 (12.50%) | 1 (4.00%)   |               |
| IIIc                                    | 0 (0.00%)  | 0 (0.00%)   |               |
| Number of harvested LNs                 | 31.5±6.9   | 29.9±11.1   | 0.709         |
| Number of harvested No.9 LNs            | 2.4±1.1    | 3.6±2.3     | 0.199         |
| Number of harvested suprapancreatic LNs | 8.9±2.6    | 11.6±5.2    | 0.176         |
| Days of first passing flatus (days)     | 5.4±1.3    | 4.6±1.4     | 0.138         |
| Hospital stay after surgery (days)      | 10.6±4.4   | 8.2±1.9     | 0.061         |
| Postoperative complications             | 4 (50.00%) | 2 (8.00%)   | <b>0.020*</b> |
| 30-day readmission after surgery        | 0 (0.00%)  | 1 (4.00%)   | 1.000         |

\*P &lt; 0.05, statistical significance
